# Supplementary material for: Effectiveness of a Postpartum Breastfeeding Support Group Intervention in Promoting Exclusive Breastfeeding and Perceived Self-Efficacy: A Multicentre Randomized Clinical Trial
Source: MDPI journal article supplement (doi:10.3390/nu16070988), 2024-03-28
Supplement: s1 [file s1]

Supplementary Table S1: Breastfeeding type postpartum to 2,4 and 6 months postpartum.

| Total type of<br>breast-<br>feeding<br>postpartum  | Type of breastfeeding at 2 months postpartum |              |                                              |              |                         |              |                                 |              |                  |                                       |          |                                | Type of breastfeeding at 4 months postpartum |                                              |                  |                         |                 |                                 |                 |                  |                                       |          |                            |              | Type of breastfeeding at 6 months postpartum |                 |                        |                 |                                 |              |                  |                                       |          |  |  |  |
|----------------------------------------------------|----------------------------------------------|--------------|----------------------------------------------|--------------|-------------------------|--------------|---------------------------------|--------------|------------------|---------------------------------------|----------|--------------------------------|----------------------------------------------|----------------------------------------------|------------------|-------------------------|-----------------|---------------------------------|-----------------|------------------|---------------------------------------|----------|----------------------------|--------------|----------------------------------------------|-----------------|------------------------|-----------------|---------------------------------|--------------|------------------|---------------------------------------|----------|--|--|--|
|                                                    | Exclusive<br>breastfeedin<br>g               |              | Breastfeedin<br>g with<br>occasional<br>help |              | Breastfeedi<br>ng mixed |              | Artificial<br>breastfeedi<br>ng |              | $\chi^2$<br>(df) | <i>p</i> -<br><i>Val</i><br><i>ue</i> | <i>V</i> | Exclusive<br>breastfeed<br>ing |                                              | Breastfeed<br>ing with<br>occasional<br>help |                  | Breastfeed<br>ing mixed |                 | Artificial<br>breastfeed<br>ing |                 | $\chi^2$<br>(df) | <i>p</i> -<br><i>Val</i><br><i>ue</i> | <i>V</i> | Exclusive<br>breastfeeding |              | Breastfeedin<br>g with<br>occasional<br>help |                 | Breastfeeding<br>mixed |                 | Artificial<br>breastfeedin<br>g |              | $\chi^2$<br>(df) | <i>p</i> -<br><i>Val</i><br><i>ue</i> | <i>V</i> |  |  |  |
|                                                    | Group                                        |              | Group                                        |              | Group                   |              | Group                           |              |                  |                                       |          |                                | Group                                        |                                              | Group            |                         | Group           |                                 | Group           |                  |                                       |          |                            |              | Group                                        |                 | Group                  |                 | Group                           |              | Group            |                                       |          |  |  |  |
|                                                    | IG                                           | CG           | IG                                           | CG           | IG                      | CG           | IG                              | CG           |                  |                                       |          |                                | IG                                           | CG                                           | IG               | CG                      | IG              | CG                              | IG              | CG               |                                       |          |                            |              | IG                                           | CG              | IG                     | CG              | IG                              | CG           | IG               | CG                                    |          |  |  |  |
|                                                    | <i>n</i><br>(%)                              | <i>n</i> (%) | <i>n</i> (%)                                 | <i>n</i> (%) | <i>n</i><br>(%)         | <i>n</i> (%) | <i>n</i><br>(%)                 | <i>n</i> (%) |                  |                                       |          |                                | <i>n</i><br>(%)                              | <i>n</i><br>(%)                              | <i>n</i><br>(%)  | <i>n</i><br>(%)         | <i>n</i><br>(%) | <i>n</i><br>(%)                 | <i>n</i><br>(%) | <i>n</i><br>(%)  |                                       |          |                            |              | <i>n</i> (%)                                 | <i>n</i><br>(%) | <i>n</i> (%)           | <i>n</i><br>(%) | <i>n</i> (%)                    | <i>n</i> (%) | <i>n</i> (%)     | <i>n</i> (%)                          |          |  |  |  |
| Exclusive<br>breastfeedin<br>g (n=298)             | 135(<br>86.5<br>)                            | 75(72.<br>8) | 11(7.<br>1)                                  | 9(8.7)       | 8(5.<br>1)              | 13(12.<br>6) | 2(1.<br>3)                      | 6(5.8<br>)   | 10.11(<br>3)     | <0.0<br>1                             | 0.2      | 113<br>(78.<br>5)              | 50(5<br>7.5)                                 | 16<br>(11.<br>1)                             | 10<br>(11.<br>5) | 8<br>(5.6)              | 14(1<br>6.1)    | 7<br>(4.9)                      | 13(1<br>4.9)    | 16.0<br>8<br>(3) | <0.0<br>1                             | 0.2<br>6 | 87(65.<br>9)               | 43(53.<br>1) | 14(10.<br>6)                                 | 8(9.<br>9)      | 26(19.<br>7)           | 22(27.<br>2)    | 5(3)                            | 8(9.)        | 5.68(<br>3)      | 0.1<br>2                              | 0.1<br>2 |  |  |  |
| z-value                                            | 2.8                                          | -2.8         | -0.5                                         | 0.5          | -2.2                    | 2.2          | -2.1                            | 2.1          |                  |                                       |          | 3.4                            | -3.4                                         | -0.1                                         | 0.1              | -2.6                    | 2.6             | -2.6                            | 2.6             |                  |                                       |          | 1.9                        | -1.9         | 0.2                                          | -0.2            | -1.3                   | 1.3             | -1.8                            | 1.8          |                  |                                       |          |  |  |  |
| Breastfeedin<br>g with<br>occasional<br>help(n=51) | 5(18<br>.5)                                  | 7(38.9<br>)  | 5(18.<br>5)                                  | 5(27.8<br>)  | 10(37<br>)              | 2(11.1<br>)  | 7(25<br>.9)                     | 4(22.<br>2)  | 4.88(3<br>)      | 0.18                                  | 0.3      | 9<br>(39.<br>1)                | 4<br>(26.<br>7)                              | 2<br>(8.7)                                   | 1(6.<br>7)       | 4<br>(17.<br>4)         | 6<br>(40)       | 8<br>(34.<br>8)                 | 4(26<br>.7)     | 2.41<br>(3)      | 0.5                                   | 0.2<br>5 | 8(57.1<br>)                | 1(8.3)       | 2(14.3<br>)                                  | 3(25<br>)       | 3(21.4<br>)            | 8(66.7<br>)     | 1(7)                            | --           | 8.81(<br>3)      | 0.0<br>3                              | 0.5<br>8 |  |  |  |
| z-value                                            | -1.5                                         | 1.5          | -0.7                                         | 0.7          | 1.9                     | -1.9         | 0.3                             | -0.3         |                  |                                       |          | 0.8                            | -0.8                                         | 0.2                                          | -0.2             | -1.5                    | 1.5             | 0.5                             | -0.5            |                  |                                       |          | 2.6                        | -2.6         | -0.7                                         | 0.7             | -2.3                   | 2.3             | 0.9                             | -0.9         |                  |                                       |          |  |  |  |
| Breastfeedin<br>g mixed<br>(n=33)                  | 4(25<br>)                                    | 3(30)        | 2(12.<br>5)                                  | --           | 6(37<br>.5)             | 3(30)        | 4(25<br>)                       | 4(40)        | 1.85(3<br>)      | 0.6                                   | 0.2      | 3<br>(23.<br>1)                | 2<br>(28.<br>6)                              | 3<br>(23.<br>1)                              | 1<br>(114<br>.3) | 2<br>(15.<br>4)         | 0 (0)           | 5<br>(38.<br>5)                 | 4<br>(57.<br>1) | 1.66<br>(3)      | 0.64                                  | 0.2<br>8 | 3(37.5<br>)                | 2(66.7<br>)  | --                                           | --              | 4(50)                  | --              | 1(12.<br>5)                     | 1(33.<br>3)  | 2.42(<br>2)      | 0.3<br>0                              | 0.       |  |  |  |
| z-value                                            | -0.3                                         | 0.3          | 1.2                                          | -1.2         | 0.4                     | -0.4         | -0.8                            | 0.8          |                  |                                       |          | -0.3                           | 0.3                                          | 0.5                                          | -0.5             | 1.1                     | -1.1            | -0.8                            | 0.8             |                  |                                       |          | -0.9                       | 0.9          | --                                           | --              | 1.5                    | -1.5            | -0.8                            | 0.8          |                  |                                       |          |  |  |  |

Note:  $\chi^2$ , chi-square test; df, degrees of freedom; *V*, Cramer's *V*; significant p-Values < 0.05; IG, intervention group; CG, control group.
